# Supplementary material for: Essential Oils of Five Baccharis Species: Investigations on the Chemical Composition and Biological Activities
Source: PubMed Central journal article supplement (PMC6222634; doi:10.3390/molecules23102620), 2018-10-12
Supplement: molecules-23-02620-s001.pdf [file molecules-23-02620-s001.pdf]

1 Article

2 **Essential oils of five *Baccharis* species: investigations**  
 3 **on the chemical composition and biological activities**

4 Jane M. Budel <sup>1,2\*</sup>, Mei Wang <sup>2</sup>, Vijayasankar Raman <sup>2</sup>, Jianping Zhao <sup>2</sup>, Shabana I. Khan <sup>2</sup>, Junaid  
 5 U. Rehman <sup>2</sup>, Natascha Techen <sup>2</sup>, Babu Tekwani <sup>2</sup>, Luciane M. Monteiro <sup>1</sup>, Gustavo Heiden <sup>4</sup>, Inês  
 6 J. M. Takeda <sup>5</sup>, Paulo V. Farago <sup>1</sup> and Iklas A. Khan <sup>2</sup>

7 <sup>1</sup>Departamento de Ciências Farmacêuticas, Universidade Estadual de Ponta Grossa (UEPG), Ponta Grossa,  
 8 PR, Brasil; janemanfron@hotmail.com; lmmonteiro@hotmail.com; pvfarago@gmail.com

9 <sup>2</sup>National Center for Natural Products Research, School of Pharmacy, University of Mississippi, University,  
 10 MS, USA; meiwang@olemiss.edu; vraman@olemiss.edu; jianping@olemiss.edu; skhan@olemiss.edu;  
 11 jurheman@olemiss.edu; ntechen@olemiss.edu; btekwani@olemiss.edu

12 <sup>3</sup>Embrapa Clima Temperado, Pelotas, RS, Brasil; gustavo.heiden@embrapa.br

13 <sup>4</sup>Departamento de Meio Ambiente, Universidade Estadual de Maringá (UEM), Umuarama, PR, Brasil;  
 14 takedaines@bol.com.br

15 \* Correspondence: janemanfron@hotmail.com; Tel.: +554133203000

16 Received: date; Accepted: date; Published: date

17

MYW-1-28-4.1.fid  
 MYW-1-28-4 in CDC3 F102-106

S1-A

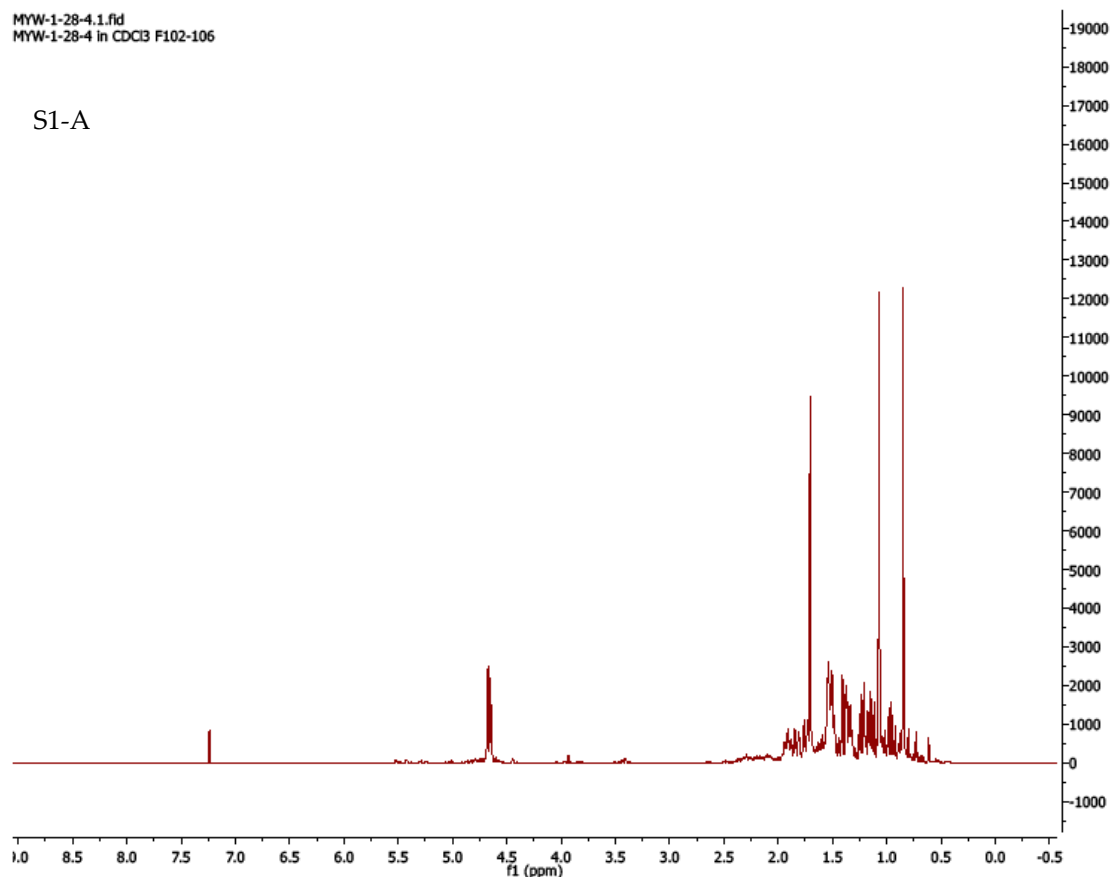

18

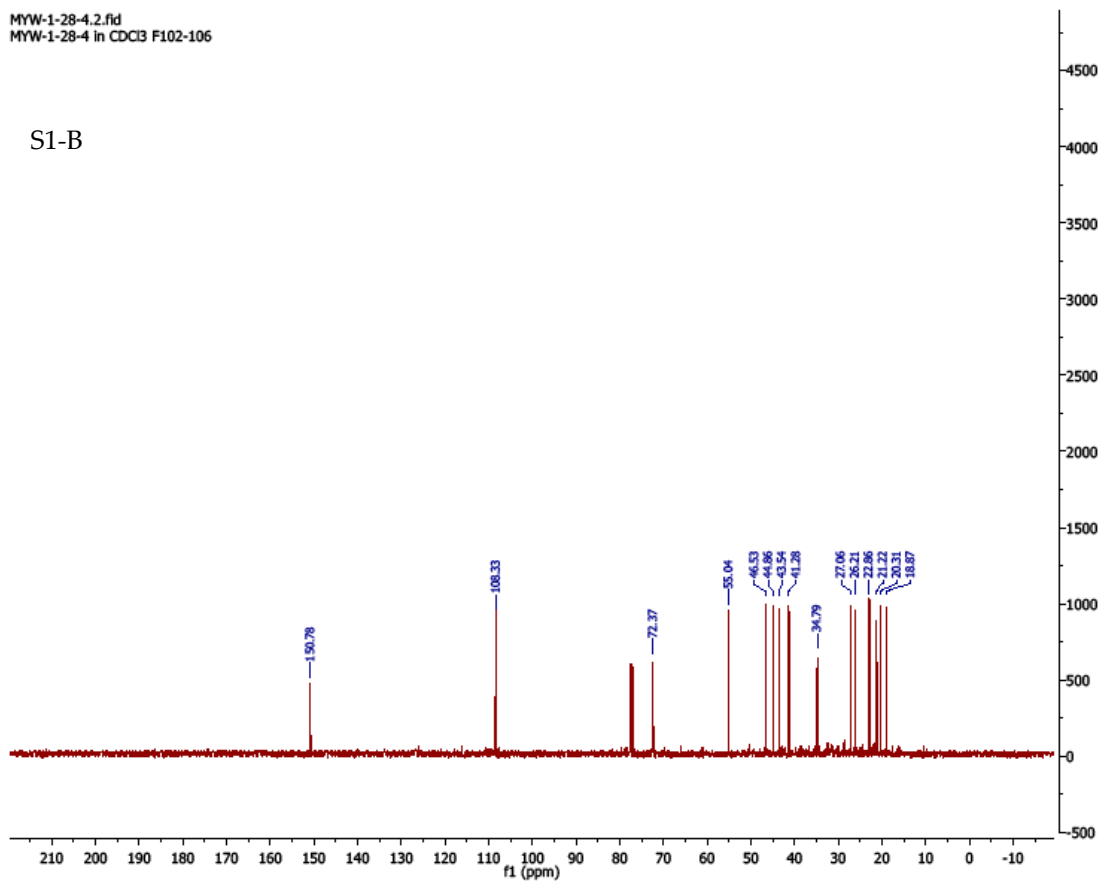

19

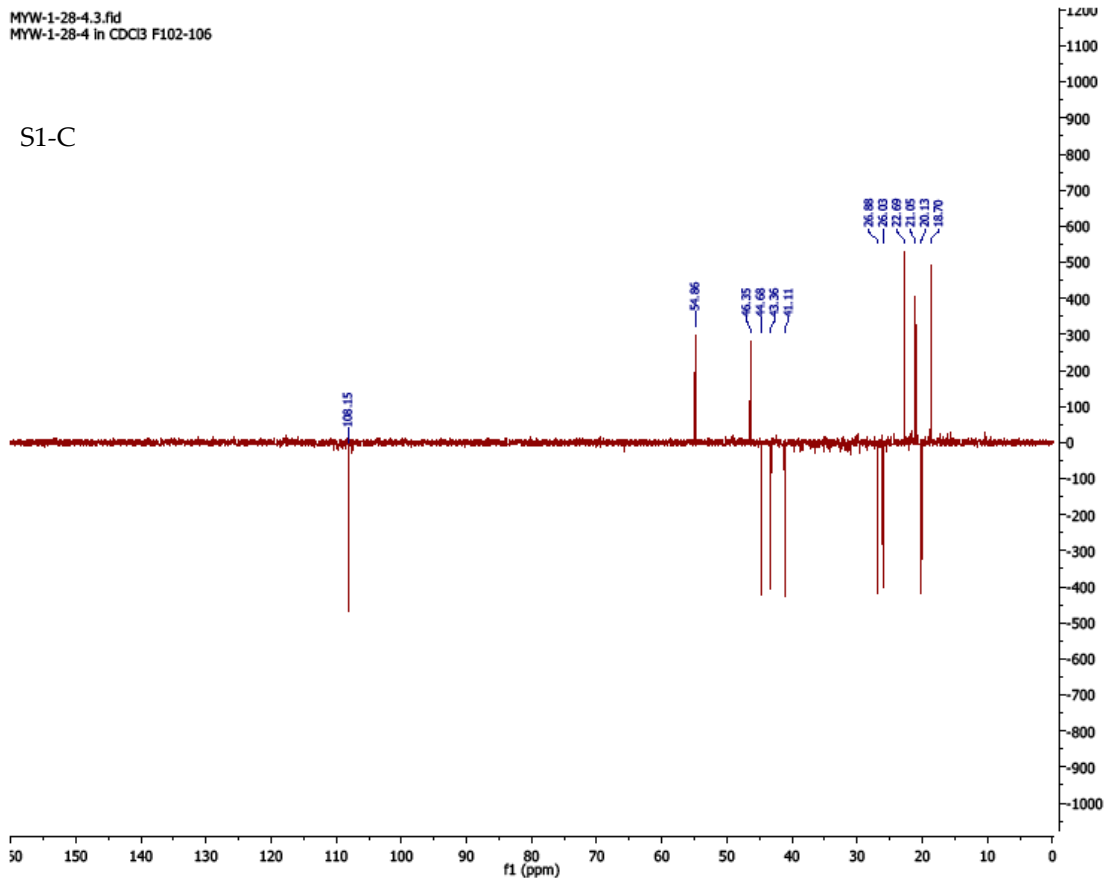20  
21

Figure S1. Proton and Carbon NMR spectra of kongol

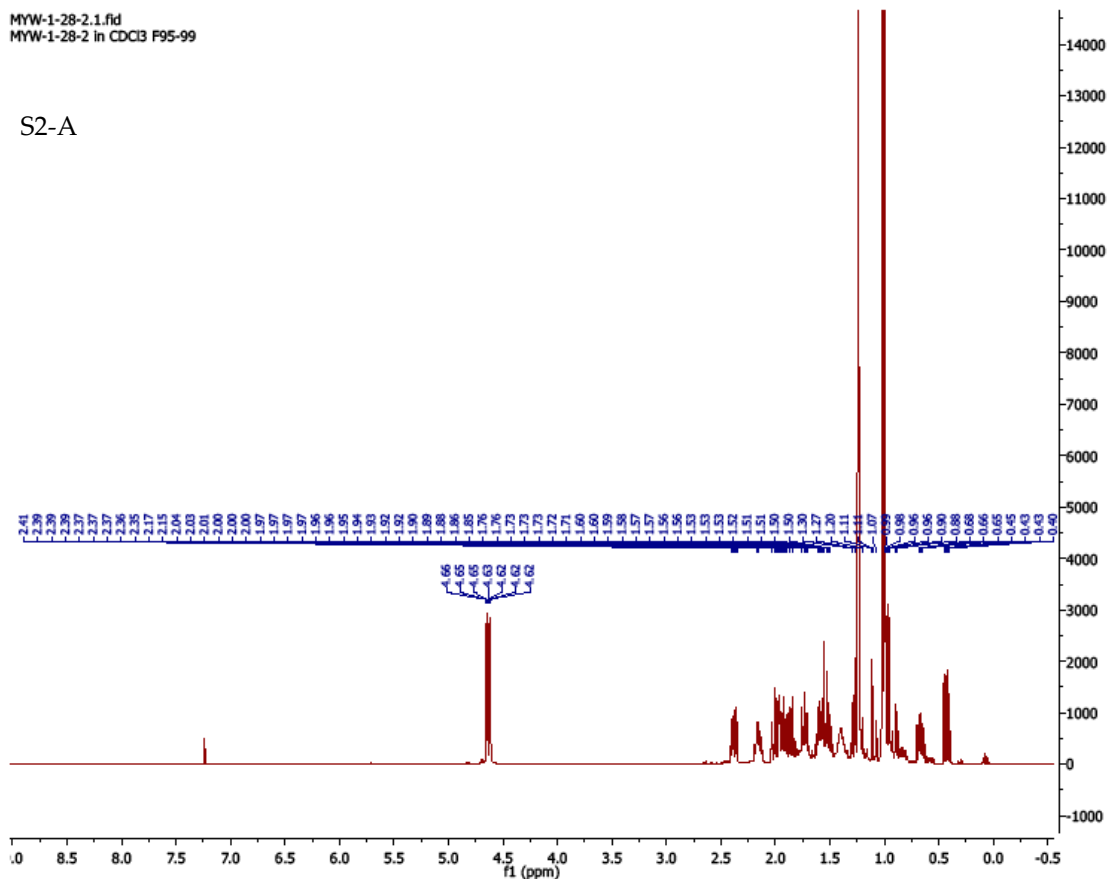

22

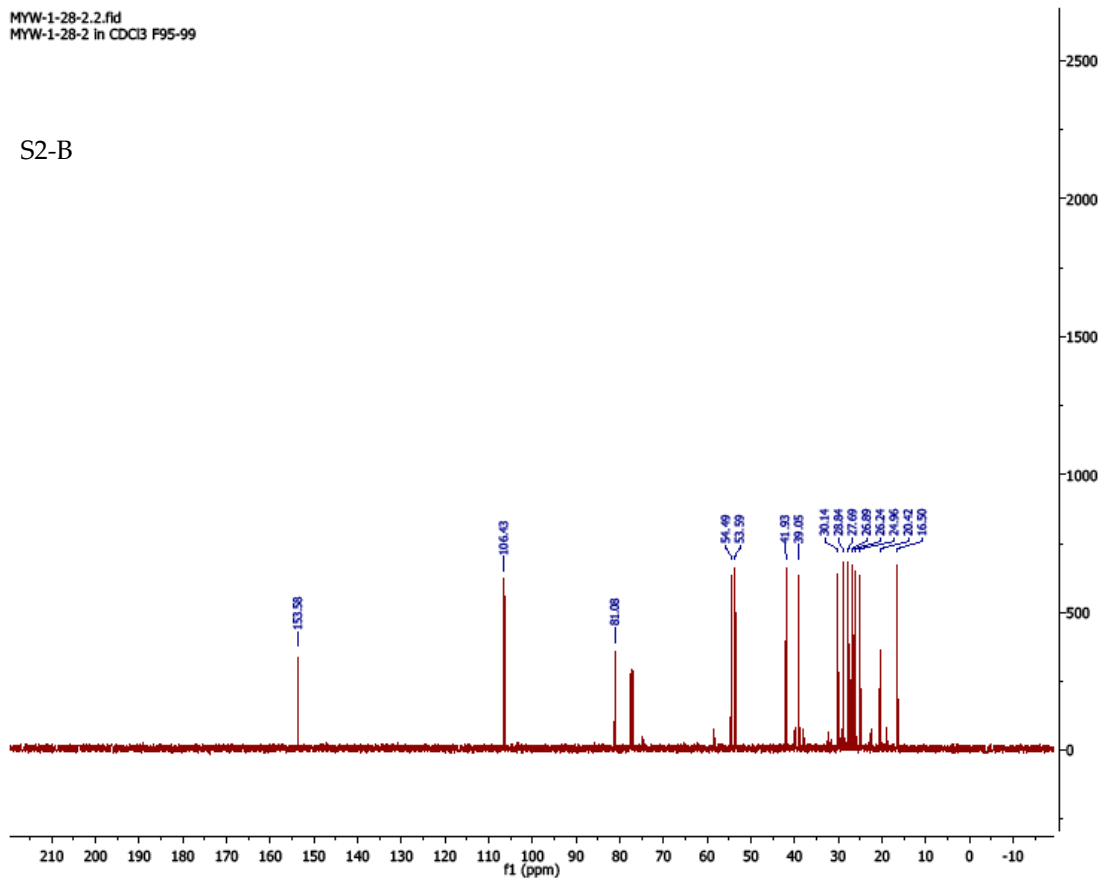

23

24

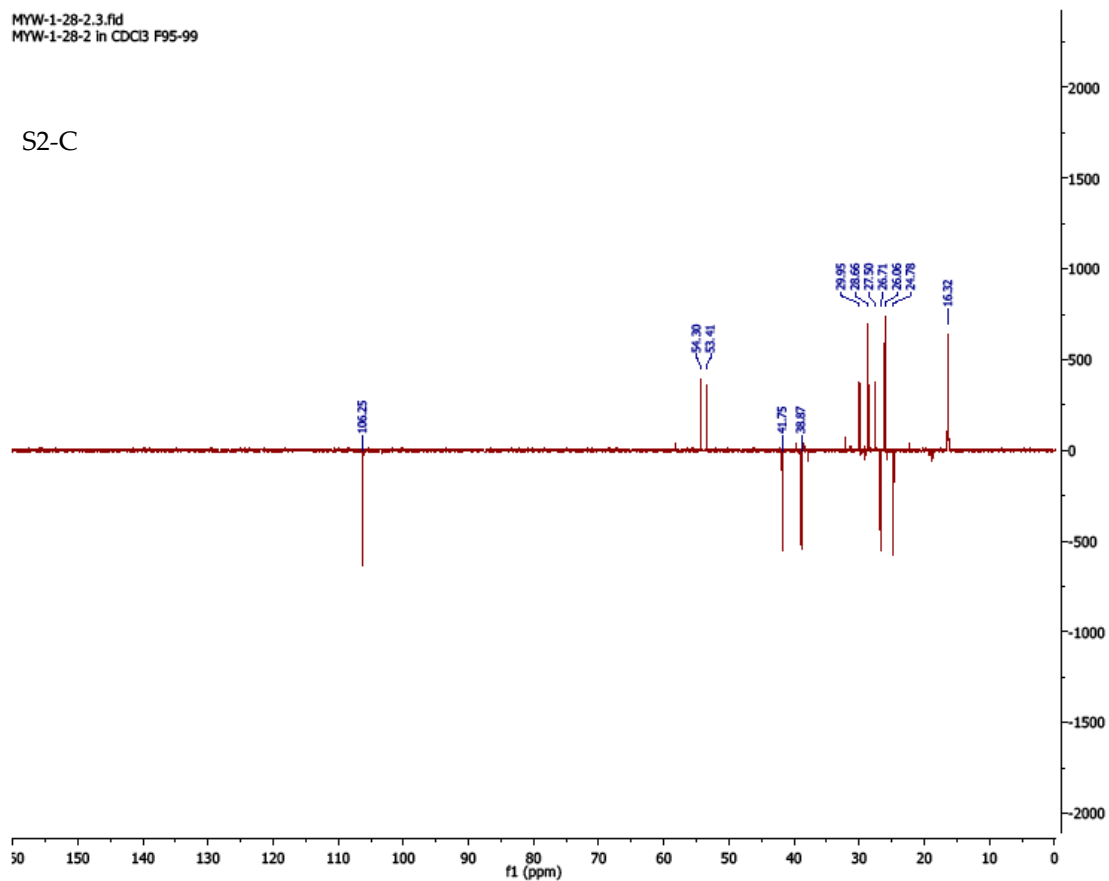

Figure S2. Proton and Carbon NMR spectra of spathulenol

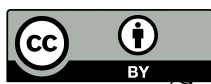

© 2018 by the authors. Submitted for possible open access publication under the terms and conditions of the Creative Commons Attribution (CC BY) license (<http://creativecommons.org/licenses/by/4.0/>).

25  
26  
27

30
